# Supplementary material for: The EGFR/miR-338-3p/EYA2 axis controls breast tumor growth and lung metastasis
Source: PubMed Central journal article supplement (PMC5550870; doi:10.1038/cddis.2017.325), 2017-07-13
Supplement: cddis2017325x1.pdf [file cddis2017325x1.pdf]

**A**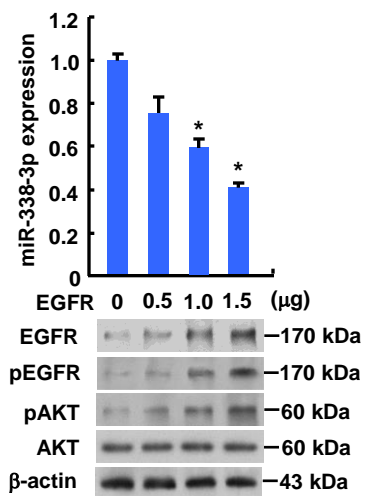**B**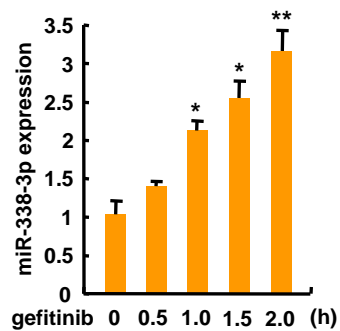**C**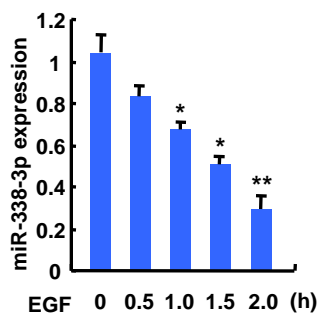**D**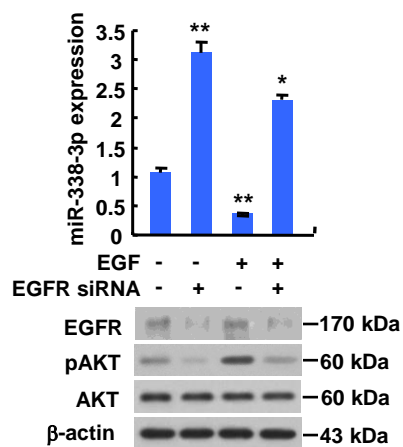

Liang YC et al, Supplementary Figure S1

**A**

Putative HIF1 $\alpha$ -binding site 1 (-2566 to 2547): 5'-GGAAGGT**ACGTG**TCCCGCC-3'  
 Mutated HIF1 $\alpha$ -binding site 1 (-2566 to 2547): 5'-GGAAGGT**CATGT**TCCCGCC-3'  
 Putative HIF1 $\alpha$ -binding site 2 (-1936 to 1917): 5'-AGTGCCA**GCGTG**CAGGAGC-3'  
 Mutated HIF1 $\alpha$ -binding site 2 (-1936 to 1917): 5'-AGTGCCA**TATGT**CAGGAGC-3'  
 Putative HIF1 $\alpha$ -binding site 3 (-86 to -67): 5'-GAAGGAC**ACGTG**GCCCCGT-3'  
 Mutative HIF1 $\alpha$ -binding site 3 (-86 to -67): 5'-GAAGGAC**CATGT**GCCCCGT-3'

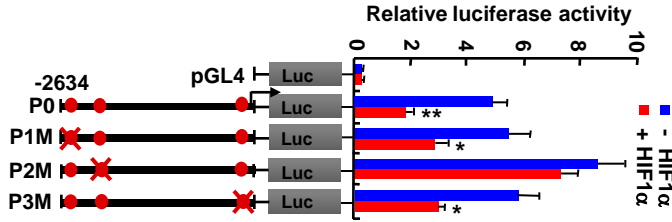

**B**

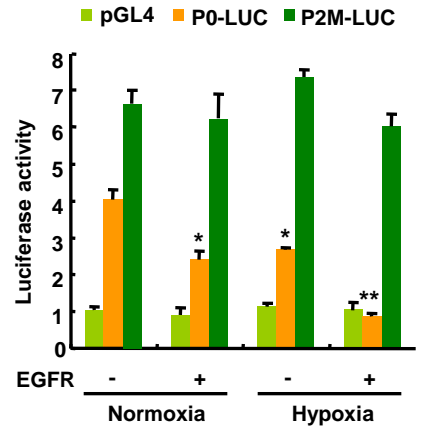

**C**

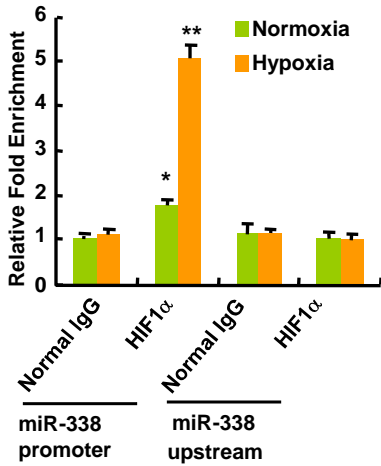

**D**

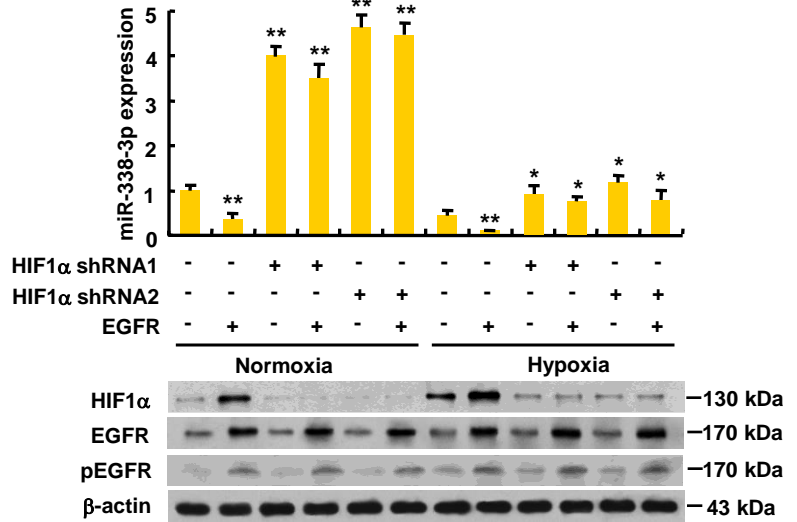

Liang YC et al, Supplementary Figure S2

**a**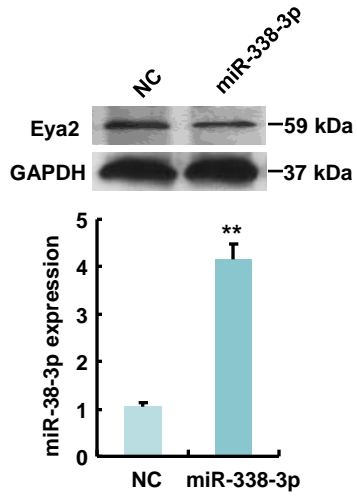**b**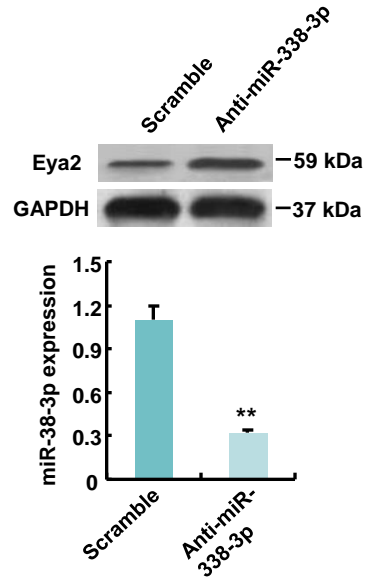**c**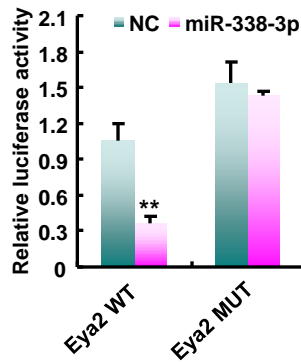

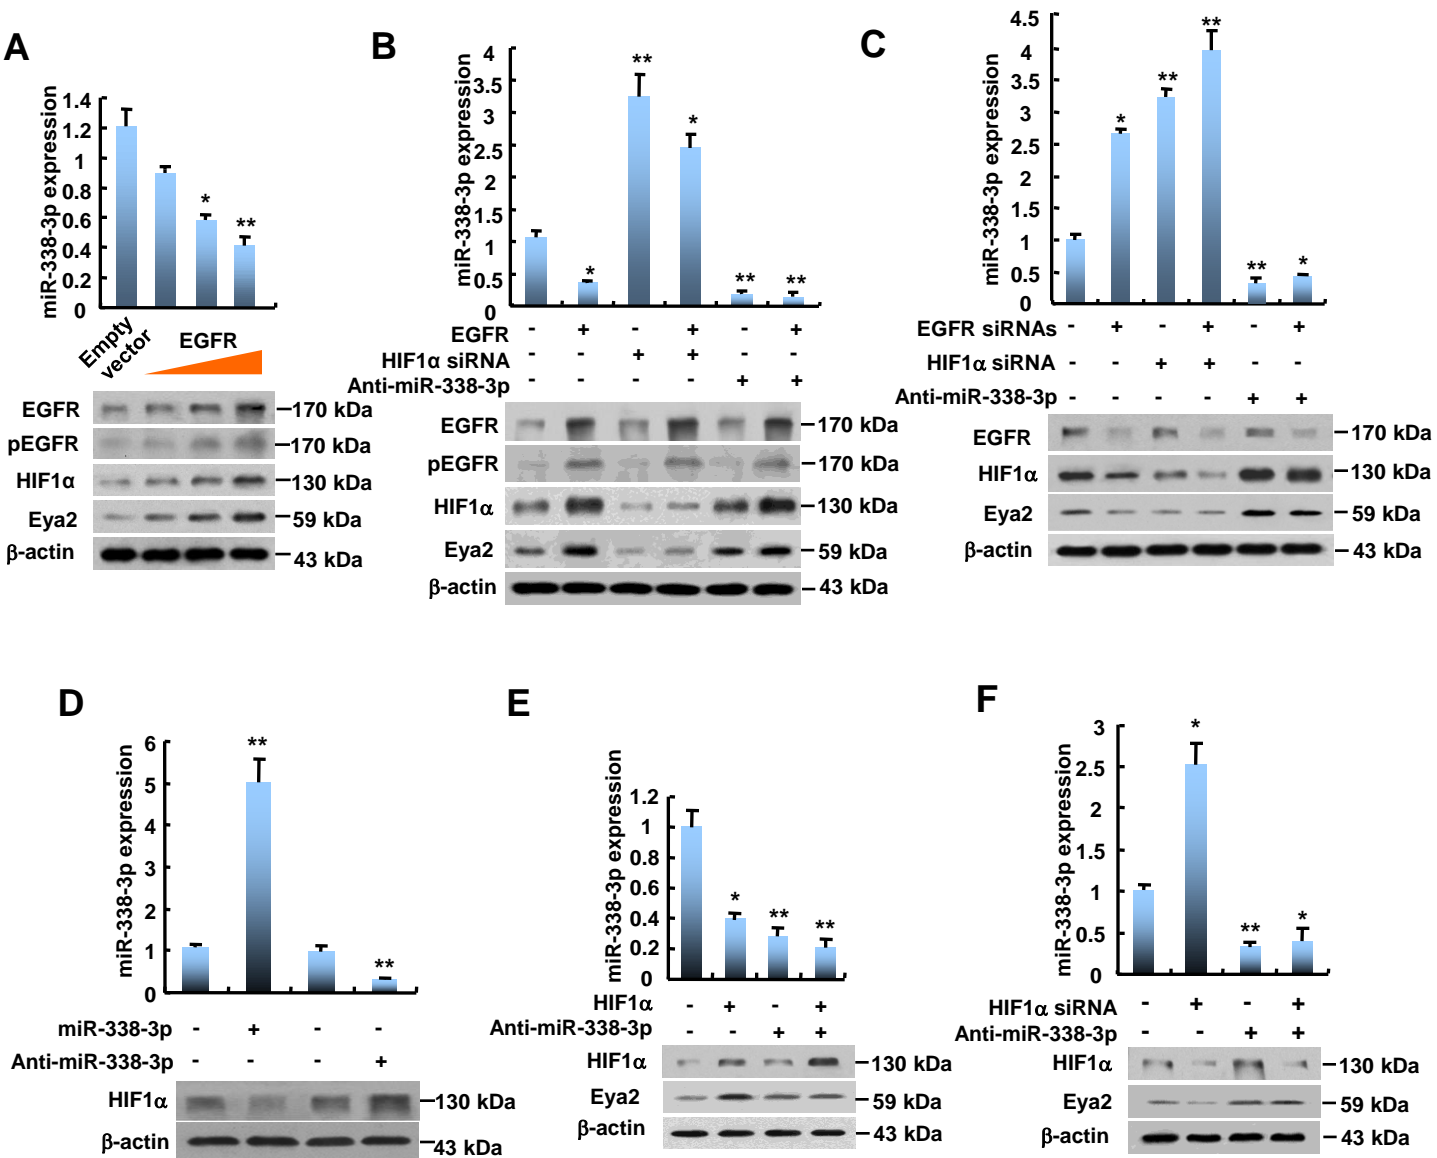

Liang YC et al, Supplementary Figure S4

**A**

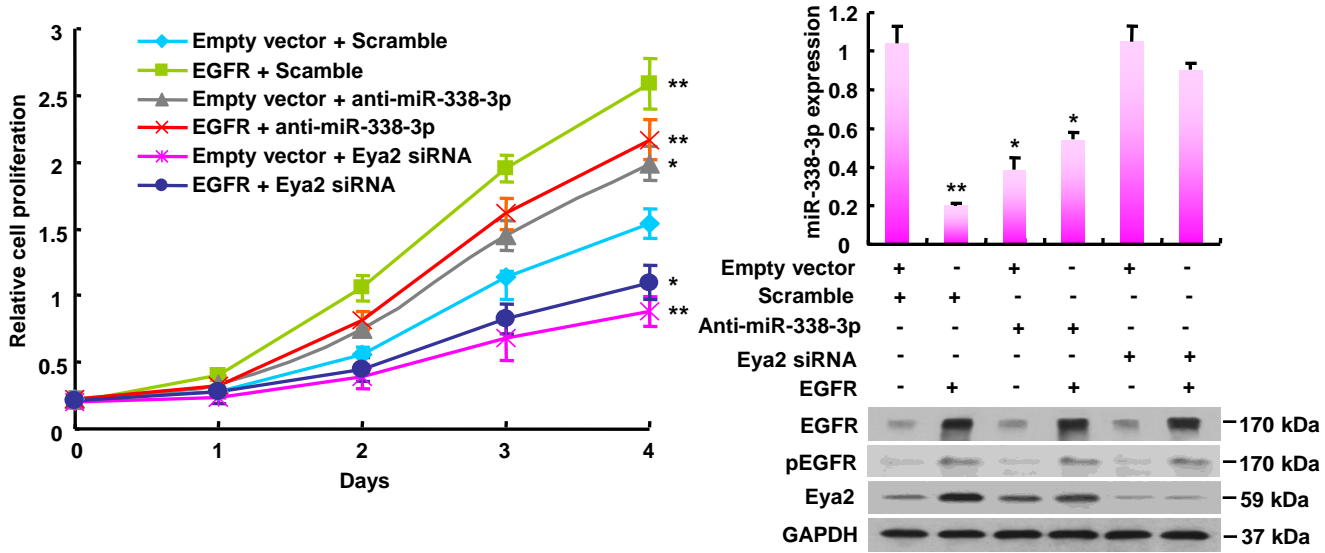

**B**

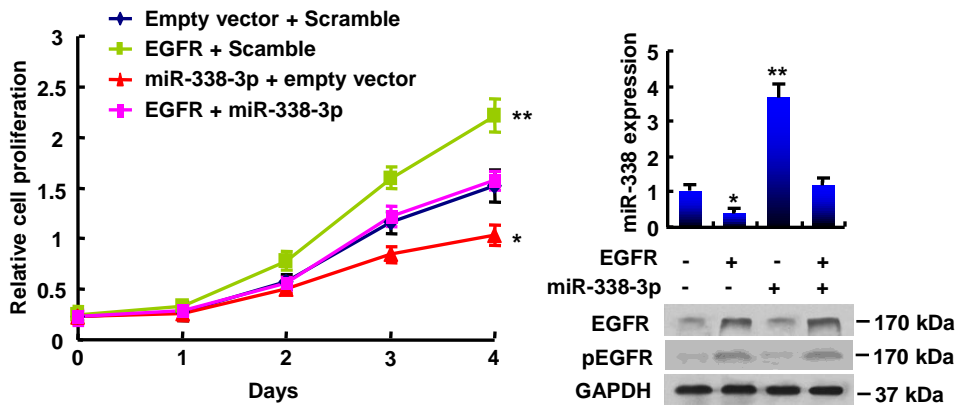

**C**

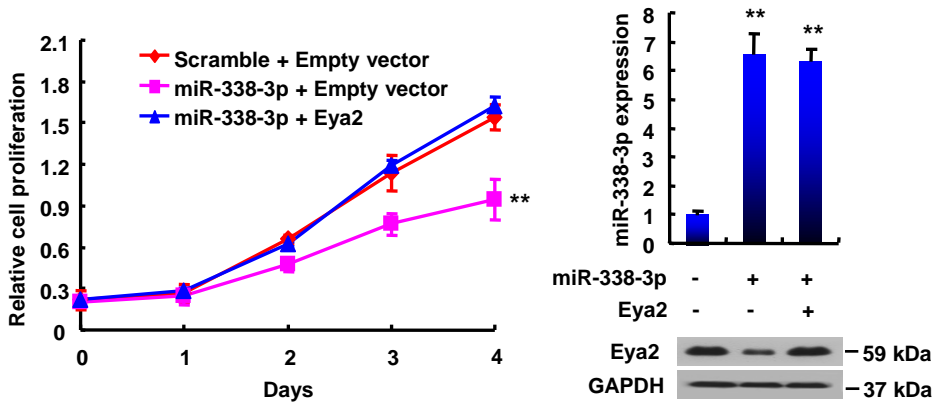

**A**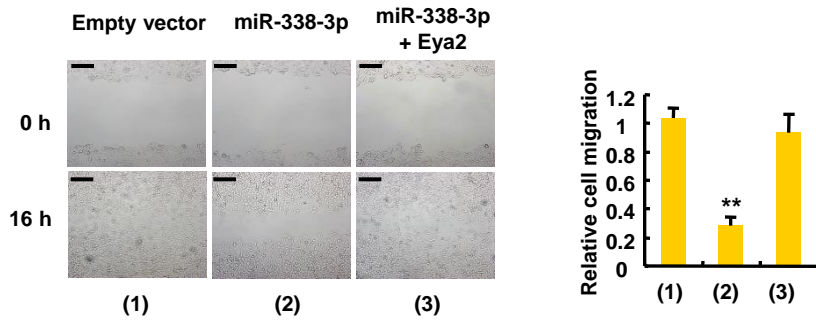**B**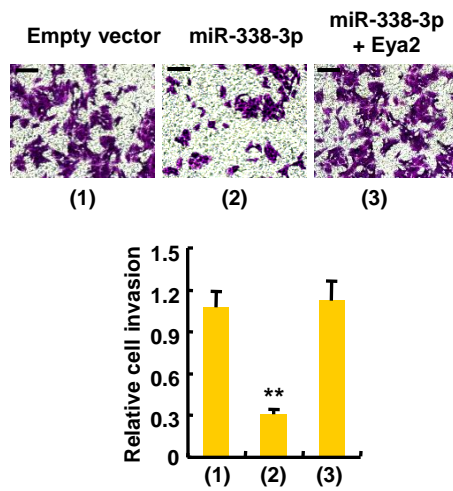**C**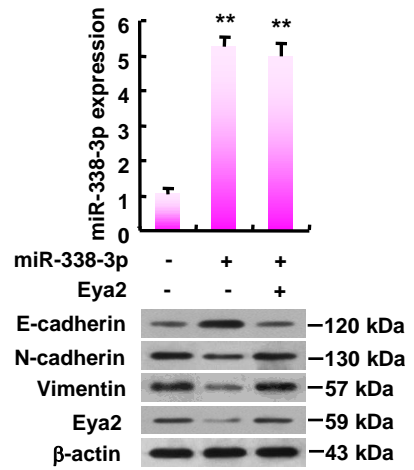

Liang YC et al, Supplementary Figure S6

**A**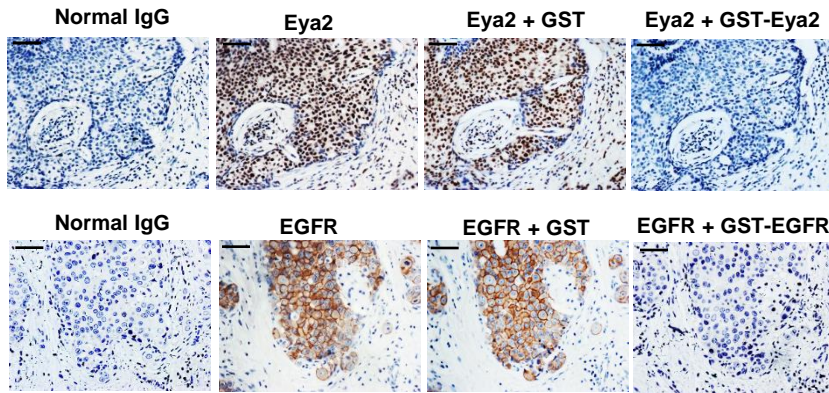**B**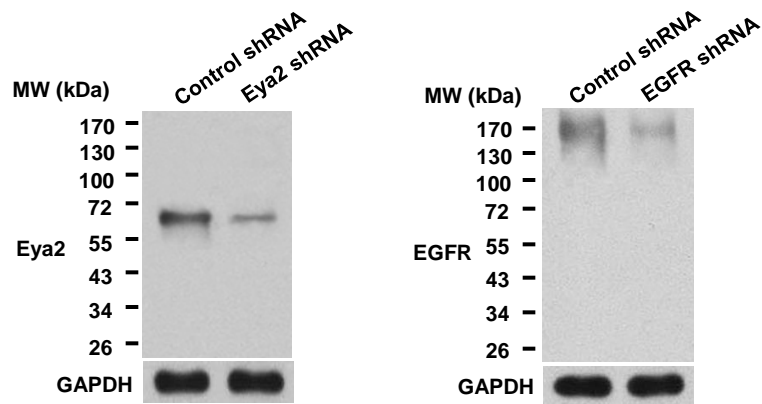**C**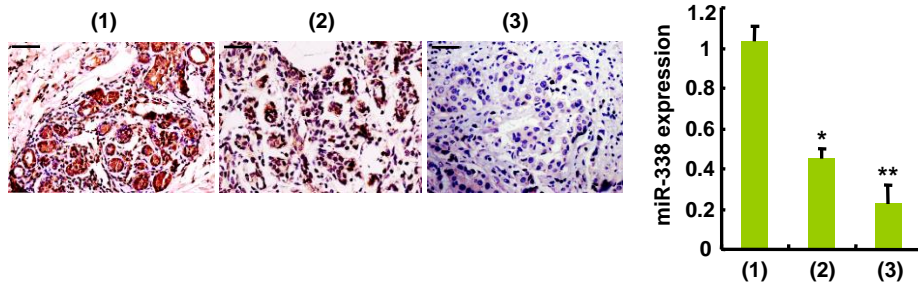**D**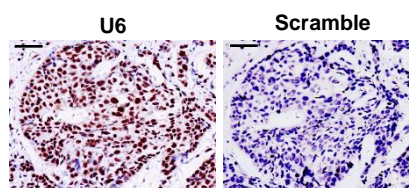

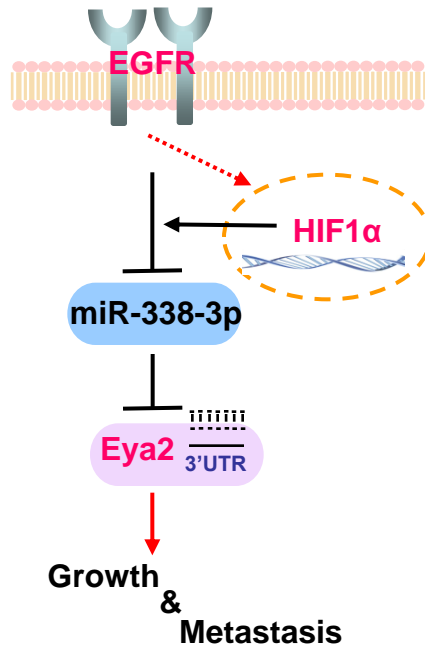

Liang YC et al, Supplementary Figure S8
